# Supplementary material for: Conformational switching fluorescent chemosensor for chloride anion
Source: Royal Society of Chemistry journal article supplement (doi:10.1039/b500252d), 2005-01-01
Supplement: b500252d.pdf [file b500252d.pdf]

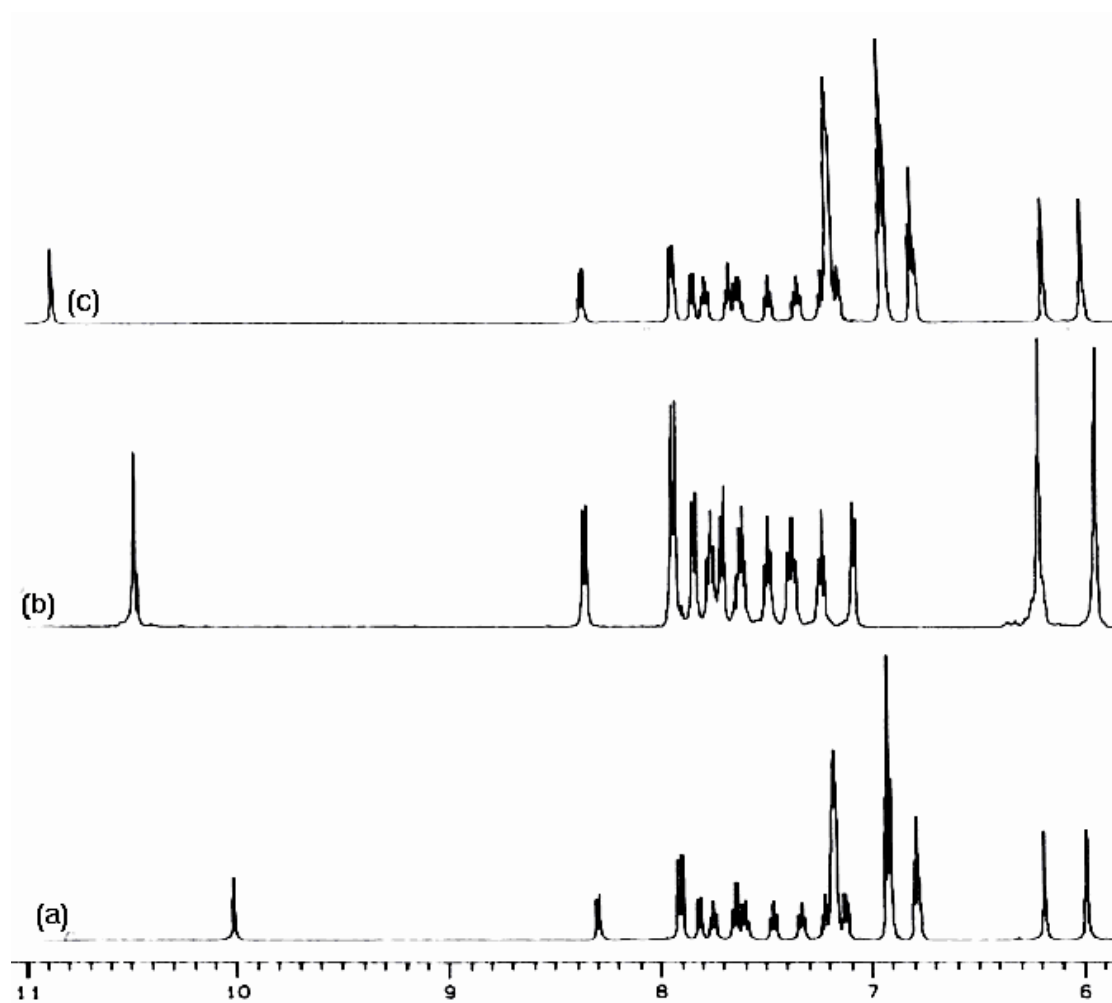

S2. <sup>1</sup>H NMR spectra of the host 1·3BPh<sub>4</sub> (a), the compound 1·3Br (b) and 1·3BPh<sub>4</sub> containing 1.0 equivalents of chloride
